# Supplementary material
Source: publisher figshare collection journal article supplement (https://tandf.figshare.com/ndownloader/files/15522167)
Supplement: Supplementary file 1 [file 15522167]

Appendix B: The average (black line) ± standard deviation (grey dotted line) transmissibility, phase and coherence of 21 participants for 24 anatomical locations in the forward lean position.

Appendix B: The average (black line) ± standard deviation (grey dotted line) transmissibility, phase and coherence of 21 participants for 24 anatomical locations in the forward lean position.

Appendix B: The average (black line) ± standard deviation (grey dotted line) transmissibility, phase and coherence of 21 participants for 24 anatomical locations in the forward lean position.

Appendix B: The average (black line) ± standard deviation (grey dotted line) transmissibility, phase and coherence of 21 participants for 24 anatomical locations in the forward lean position.
